# Supplementary material for: Genome-wide identification, evolution, and expression analysis of the NPR1-like gene family in pears
Source: PeerJ. 2021 Dec 15;9:e12617. doi: 10.7717/peerj.12617 (PMC8684321; doi:10.7717/peerj.12617)
Supplement: Supplemental Information 2 [file peerj-09-12617-s002.xlsx]

## Sheet: tissue qrtpcr
Expression profile of the PbrNPR1-like genes in the tested tissues
	Pbrgene2529	Pbrgene6286	Pbrgene8341	Pbrgene8895	Pbrgene8896	Pbrgene34018	Pbrgene40077	Pbrgene12425
FR	1.0386	0.885395	0.881261	0.954507	1.01691	1.26251	1.06957	1.06016
FB	0.285808	6.8286	0.043133	0.580727	5.64378	0.629184	0.661764	2.00515
YL	0.582383	11.5373	6.89943	4.05027	7.76713	0.300361	0.831189	5.92506
ML	1.16863	21.1177	8.7344	5.22765	1.85251	0.0411325	2.11149	9.93681
YS	0.636038	16.765	3.97918	4.23369	3.65571	0.0315105	0.572857	1.48581
MS	1.17889	11.1704	5.51945	7.16482	3.4059	0.28747	3.94634	1.38502
YF	0.148791	6.7322	1.97643	1.22835	1.11378	0.348628	1.36504	0.691076
MF	0.0178294	3.26374	0.538992	0.311498	0.104825	0.048839	1.18158	0.228193
SD	0.247108	12.779	0.518266	6.15215	3.06786	0.00605236	0.727021	4.49322
BD	1.30515	9.92866	1.26674	4.59484	3.57994	0.418643	3.61529	5.52614
Pbrgene11264
1	0.737135						Sample Name	ACTIN	Cq	ΔCt		ΔΔCt	2（-ΔΔCt）	Mean value	Variance
2	1.3566	Tissue	Mean value	Variance	Significant difference		FR	18.82	25.69	6.87	6.43	0.44	0.737135	1.06016	0.253595
3	1.08673	FR	1.06016	0.253595	c		FR	19.88	25.87	5.99	6.43	-0.44	1.3566
4	3.36359	FB	2.00515	0.986681	c		FR	19.12	25.43	6.31	6.43	-0.12	1.08673
5	1.60214	YL	5.92506	1.52092	b		FB	19.88	24.56	4.68	6.43	-1.75	3.36359	2.00515	0.986681
6	1.04972	ML	9.93681	1.5188	a		FB	19.89	25.64	5.75	6.43	-0.68	1.60214
7	4.05584	YS	1.48581	0.405513	c		FB	19.78	26.14	6.36	6.43	-0.07	1.04972
8	7.78124	MS	1.38502	0.232307	c		YL	19.7	24.11	4.41	6.43	-2.02	4.05584	5.92506	1.52092
9	5.93809	YF	0.691076	0.079826	c		YL	20.28	23.75	3.47	6.43	-2.96	7.78124
10	8.51496	MF	0.228193	0.0244848	c		YL	20.89	24.75	3.86	6.43	-2.57	5.93809
11	12.042	SD	4.49322	1.64672	b		ML	20.29	23.63	3.34	6.43	-3.09	8.51496	9.93681	1.5188
12	9.25351	BD	5.52614	1.70182	b		ML	20.48	23.32	2.84	6.43	-3.59	12.042
13	1.32869						ML	20.75	23.97	3.22	6.43	-3.21	9.25351
14	2.04202						YS	19.48	25.5	6.02	6.43	-0.41	1.32869	1.48581	0.405513
15	1.08673						YS	19.75	25.15	5.4	6.43	-1.03	2.04202
16	1.13288						YS	20.12	26.43	6.31	6.43	-0.12	1.08673
17	1.32869						MS	19.98	26.23	6.25	6.43	-0.18	1.13288	1.38502	0.232307
18	1.69349						MS	18.98	25	6.02	6.43	-0.41	1.32869
19	0.742262						MS	20.08	25.75	5.67	6.43	-0.76	1.69349
20	0.752623						YF	19.36	26.22	6.86	6.43	0.43	0.742262	0.691076	0.079826
21	0.578344						YF	18.91	25.75	6.84	6.43	0.41	0.752623
22	0.22688						YF	20.45	27.67	7.22	6.43	0.79	0.578344
23	0.198884						ML	17.86	26.43	8.57	6.43	2.14	0.22688	0.228193	0.0244848
24	0.258816						ML	18.02	26.78	8.76	6.43	2.33	0.198884
25	3.27161						ML	18.76	27.14	8.38	6.43	1.95	0.258816
26	6.82108						SD	19.36	24.08	4.72	6.43	-1.71	3.27161	4.49322	1.64672
27	3.38698						SD	20.52	24.18	3.66	6.43	-2.77	6.82108
28	4.95883						SD	20.38	25.05	4.67	6.43	-1.76	3.38698
29	7.83536						BD	20.45	24.57	4.12	6.43	-2.31	4.95883	5.52614	1.70182
30	3.78423						BD	20.17	23.63	3.46	6.43	-2.97	7.83536
							BD	20.87	25.38	4.51	6.43	-1.92	3.78423
Pbrgene6286			Tissue	Mean value	Variance	Significant difference
1	1.43396		FR	0.885395	0.394232	e	Sample Name	ACTIN	Cq	ΔCt		ΔΔCt	2（-ΔΔCt）	Mean value	Variance
2	0.697372		FB	6.8286	0.87511	cd	FR	18.82	24.48	5.66	6.18	-0.52	1.43396	0.885395	0.394232
3	0.524858		YL	11.5373	2.05453	bc	FR	19.88	26.58	6.7	6.18	0.52	0.697372
4	8		ML	21.1177	3.63929	a	FR	19.12	26.23	7.11	6.18	0.93	0.524858
5	6.58873		YS	16.765	1.66592	ab	FB	19.88	23.06	3.18	6.18	-3	8	6.8286	0.87511
6	5.89708		MS	11.1704	3.14382	bc	FB	19.89	23.35	3.46	6.18	-2.72	6.58873
7	14.42		YF	6.7322	1.10454	cd	FB	19.78	23.4	3.62	6.18	-2.56	5.89708
8	10.4107		MF	3.26374	0.78823	de	YL	19.7	22.03	2.33	6.18	-3.85	14.42	11.5373	2.05453
9	9.78112		SD	12.779	5.38684	bc	YL	20.28	23.08	2.8	6.18	-3.38	10.4107
10	19.4271		BD	9.92866	2.52476	c	YL	20.89	23.78	2.89	6.18	-3.29	9.78112
11	26.1729						ML	20.29	22.19	1.9	6.18	-4.28	19.4271	21.1177	3.63929
12	17.7531						ML	20.48	21.95	1.47	6.18	-4.71	26.1729
13	14.5203						ML	20.75	22.78	2.03	6.18	-4.15	17.7531
14	18.507						YS	19.48	21.8	2.32	6.18	-3.86	14.5203	16.765	1.66592
15	17.2677						YS	19.75	21.72	1.97	6.18	-4.21	18.507
16	15.455						YS	20.12	22.19	2.07	6.18	-4.11	17.2677
17	10.0561						MS	19.98	22.21	2.23	6.18	-3.95	15.455	11.1704	3.14382
18	8						MS	18.98	21.83	2.85	6.18	-3.33	10.0561
19	7.78124						MS	20.08	23.26	3.18	6.18	-3	8
20	5.20537						YF	19.36	22.58	3.22	6.18	-2.96	7.78124	6.7322	1.10454
21	7.21						YF	18.91	22.71	3.8	6.18	-2.38	5.20537
22	3.20428						YF	20.45	23.78	3.33	6.18	-2.85	7.21
23	2.32947						ML	17.86	22.36	4.5	6.18	-1.68	3.20428	3.26374	0.78823
24	4.25748						ML	18.02	22.98	4.96	6.18	-1.22	2.32947
25	8.75435						ML	18.76	22.85	4.09	6.18	-2.09	4.25748
26	20.393						SD	19.36	22.41	3.05	6.18	-3.13	8.75435	12.779	5.38684
27	9.18959						SD	20.52	22.35	1.83	6.18	-4.35	20.393
28	13.3614						SD	20.38	23.36	2.98	6.18	-3.2	9.18959
29	7.3615						BD	20.45	22.89	2.44	6.18	-3.74	13.3614	9.92866	2.52476
30	9.06307						BD	20.17	23.47	3.3	6.18	-2.88	7.3615
							BD	20.87	23.87	3	6.18	-3.18	9.06307
Pbrgene8895			Tissue	Mean value	Variance	Significant difference
1	1.19334		FR	0.954507	0.168894	d	Sample Name	ACTIN	Cq	ΔCt		ΔΔCt	2（-ΔΔCt）	Mean value	Variance
2	0.837987		FB	0.580727	0.225965	d	FR	18.82	25.42	6.6	6.855	-0.255	1.19334	0.954507	0.168894
3	0.832199		YL	4.05027	0.465851	c	FR	19.88	26.99	7.11	6.855	0.255	0.837987
4	0.891929		ML	5.22765	0.649007	bc	FR	19.12	26.24	7.12	6.855	0.265	0.832199
5	0.362236		YS	4.23369	0.730419	c	FB	19.88	26.9	7.02	6.855	0.165	0.891929	0.580727	0.225965
6	0.488016		MS	7.16482	1.03155	a	FB	19.89	28.21	8.32	6.855	1.465	0.362236
7	4.61075		YF	1.22835	0.739281	d	FB	19.78	27.67	7.89	6.855	1.035	0.488016
8	4.06992		MF	0.311498	0.0784075	d	YL	19.7	24.35	4.65	6.855	-2.205	4.61075	4.05027	0.465851
9	3.47015		SD	6.15215	0.946131	ab	YL	20.28	25.11	4.83	6.855	-2.025	4.06992
10	5.18736		BD	4.59484	1.06096	c	YL	20.89	25.95	5.06	6.855	-1.795	3.47015
11	4.45369						ML	20.29	24.77	4.48	6.855	-2.375	5.18736	5.22765	0.649007
12	6.04189						ML	20.48	25.18	4.7	6.855	-2.155	4.45369
13	5.25977						ML	20.75	25.01	4.26	6.855	-2.595	6.04189
14	3.61752						YS	19.48	23.94	4.46	6.855	-2.395	5.25977	4.23369	0.730419
15	3.82378						YS	20.15	25.15	5	6.855	-1.855	3.61752
16	8.19645						YS	21.12	26.04	4.92	6.855	-1.935	3.82378
17	7.54228						MS	19.98	23.8	3.82	6.855	-3.035	8.19645	7.16482	1.03155
18	5.75573						MS	20.08	24.02	3.94	6.855	-2.915	7.54228
19	2.12138						MS	20.08	24.41	4.33	6.855	-2.525	5.75573
20	0.311003						YF	19.36	25.13	5.77	6.855	-1.085	2.12138	1.22835	0.739281
21	1.25266						YF	18.91	27.45	8.54	6.855	1.685	0.311003
22	0.247414						YF	20.45	26.98	6.53	6.855	-0.325	1.25266
23	0.265172						ML	17.86	26.73	8.87	6.855	2.015	0.247414	0.311498	0.0784075
24	0.421908						ML	18.02	26.79	8.77	6.855	1.915	0.265172
25	5.48313						ML	18.76	26.86	8.1	6.855	1.245	0.421908
26	7.49018						SD	19.36	23.76	4.4	6.855	-2.455	5.48313	6.15215	0.946131
27	5.48313						SD	20.52	24.47	3.95	6.855	-2.905	7.49018
28	4.77334						SD	20.38	24.78	4.4	6.855	-2.455	5.48313
29	5.79577						BD	21.45	26.05	4.6	6.855	-2.255	4.77334	4.59484	1.06096
30	3.2154						BD	20.17	24.49	4.32	6.855	-2.535	5.79577
							BD	20.87	26.04	5.17	6.855	-1.685	3.2154
Pbrgene2529
1	0.888843		Tissue	Mean value	Variance	Significant difference	Sample Name	ACTIN	Cq	ΔCt		ΔΔCt	2（-ΔΔCt）	Mean value	Variance
2	1.12506		FR	1.0386	0.106317	a	FR	22.02	26.07	4.05	3.88	0.17	0.888843	1.0386	0.106317
3	1.10191		FB	0.285808	0.0631132	bc	FR	19.88	23.59	3.71	3.88	-0.17	1.12506
4	0.228458		YL	0.582383	0.154658	b	FR	20.02	23.76	3.74	3.88	-0.14	1.10191
5	0.373712		ML	1.16863	0.46736	a	FB	19.88	25.89	6.01	3.88	2.13	0.228458	0.285808	0.0631132
6	0.255253		YS	0.636038	0.0171376	b	FB	19.89	25.19	5.3	3.88	1.42	0.373712
7	0.476319		MS	1.17889	0.0873119	a	FB	19.78	25.63	5.85	3.88	1.97	0.255253
8	0.80107		YF	0.148791	0.0313227	c	YL	20.7	25.65	4.95	3.88	1.07	0.476319	0.582383	0.154658
9	0.469761		MF	0.0178294	0.00291809	c	YL	20.28	24.48	4.2	3.88	0.32	0.80107
10	0.795536		SD	0.247108	0.0229697	bc	YL	20.89	25.86	4.97	3.88	1.09	0.469761
11	1.82766		BD	1.30515	0.243385	a	ML	21.89	26.1	4.21	3.88	0.33	0.795536	1.16863	0.46736
12	0.882703						ML	20.48	23.49	3.01	3.88	-0.87	1.82766
13	0.659754						ML	20.95	25.01	4.06	3.88	0.18	0.882703
14	0.619854						YS	19.48	23.96	4.48	3.88	0.6	0.659754	0.636038	0.0171376
15	0.628507						YS	19.75	24.32	4.57	3.88	0.69	0.619854
16	1.05702						YS	20.12	24.67	4.55	3.88	0.67	0.628507
17	1.25701						MS	19.98	23.78	3.8	3.88	-0.08	1.05702	1.17889	0.0873119
18	1.22264						MS	18.98	22.53	3.55	3.88	-0.33	1.25701
19	0.107321						MS	20.08	23.67	3.59	3.88	-0.29	1.22264
20	0.183011						YF	19.86	26.96	7.1	3.88	3.22	0.107321	0.148791	0.0313227
21	0.156041						YF	18.91	25.24	6.33	3.88	2.45	0.183011
22	0.018453						YF	20.45	27.01	6.56	3.88	2.68	0.156041
23	0.0139848						ML	19.86	29.5	9.64	3.88	5.76	0.018453	0.0178294	0.00291809
24	0.0210505						ML	18.02	28.06	10.04	3.88	6.16	0.0139848
25	0.262429						ML	18.76	28.21	9.45	3.88	5.57	0.0210505
26	0.264255						SD	19.36	25.17	5.81	3.88	1.93	0.262429	0.247108	0.0229697
27	0.214641						SD	20.52	26.32	5.8	3.88	1.92	0.264255
28	1.22264						SD	20.38	26.48	6.1	3.88	2.22	0.214641
29	1.6358						BD	21.45	25.04	3.59	3.88	-0.29	1.22264	1.30515	0.243385
30	1.05702						BD	20.17	23.34	3.17	3.88	-0.71	1.6358
							BD	20.87	24.67	3.8	3.88	-0.08	1.05702
Pbrgene8341			Tissue	Mean value	Variance	Significant difference
1	1.12117		FR	0.881261	0.200379	de	Sample Name	ACTIN	Cq	ΔCt		ΔΔCt	2（-ΔΔCt）	Mean value	Variance
2	0.891929		FB	0.043133	0.0263568	e	FR	18.82	23.03	4.21	4.375	-0.165	1.12117	0.881261	0.200379
3	0.630689		YL	6.89943	1.72762	b	FR	19.88	24.42	4.54	4.375	0.165	0.891929
4	0.0788361		ML	8.7344	1.09909	a	FR	19.12	24.16	5.04	4.375	0.665	0.630689
5	0.0160087		YS	3.97918	0.304389	c	FB	19.88	27.92	8.04	4.375	3.665	0.0788361	0.043133	0.0263568
6	0.0345541		MS	5.51945	1.50818	bc	FB	19.89	30.23	10.34	4.375	5.965	0.0160087
7	8.96933		YF	1.97643	0.41399	d	FB	19.78	29.01	9.23	4.375	4.855	0.0345541
8	4.74037		MF	0.538992	0.0515295	de	YL	19.7	20.91	1.21	4.375	-3.165	8.96933	6.89943	1.72762
9	6.98858		SD	0.518266	0.0489314	de	YL	20.28	22.41	2.13	4.375	-2.245	4.74037
10	10.0213		BD	1.26674	0.113913	de	YL	20.89	22.46	1.57	4.375	-2.805	6.98858
11	7.33603						ML	20.29	21.34	1.05	4.375	-3.325	10.0213	8.7344	1.09909
12	8.84585						ML	20.48	21.98	1.5	4.375	-2.875	7.33603
13	3.87716						ML	20.75	21.98	1.23	4.375	-3.145	8.84585
14	3.66802						YS	19.48	21.9	2.42	4.375	-1.955	3.87716	3.97918	0.304389
15	4.39237						YS	19.75	22.25	2.5	4.375	-1.875	3.66802
16	7.64756						YS	20.12	22.36	2.24	4.375	-2.135	4.39237
17	4.3319						MS	19.98	21.42	1.44	4.375	-2.935	7.64756	5.51945	1.50818
18	4.5789						MS	18.98	21.24	2.26	4.375	-2.115	4.3319
19	2.52275						MS	20.08	22.26	2.18	4.375	-2.195	4.5789
20	1.52098						YF	19.36	22.4	3.04	4.375	-1.335	2.52275	1.97643	0.41399
21	1.88557						YF	18.91	22.68	3.77	4.375	-0.605	1.52098
22	0.600818						YF	20.45	23.91	3.46	4.375	-0.915	1.88557
23	0.474671						ML	17.86	22.97	5.11	4.375	0.735	0.600818	0.538992	0.0515295
24	0.541488						ML	18.02	23.47	5.45	4.375	1.075	0.474671
25	0.449066						ML	18.76	24.02	5.26	4.375	0.885	0.541488
26	0.552865						SD	19.36	24.89	5.53	4.375	1.155	0.449066	0.518266	0.0489314
27	0.552865						SD	20.52	25.75	5.23	4.375	0.855	0.552865
28	1.34257						SD	20.38	25.61	5.23	4.375	0.855	0.552865
29	1.35191						BD	20.45	24.4	3.95	4.375	-0.425	1.34257	1.26674	0.113913
30	1.10573						BD	20.17	24.11	3.94	4.375	-0.435	1.35191
							BD	20.87	25.1	4.23	4.375	-0.145	1.10573
Pbrgene8896
0.732043		Tissue	Mean value	Variance	Significant difference		Sample Name	ACTIN	Cq	ΔCt		ΔΔCt	2（-ΔΔCt）	Mean value	Variance
1.36604		FR	1.01691	0.262788	d		FR	18.82	27.97	9.15	8.7	0.45	0.732043	1.01691	0.262788
0.952638		FB	5.64378	1.05799	b		FR	19.88	28.13	8.25	8.7	-0.45	1.36604
6.86852		YL	7.76713	1.60477	a		FR	19.12	27.89	8.77	8.7	0.07	0.952638
5.77572		ML	1.85251	0.361427	cd		FB	19.88	25.8	5.92	8.7	-2.78	6.86852	5.64378	1.05799
4.28709		YS	3.65571	0.797355	c		FB	20.89	27.06	6.17	8.7	-2.53	5.77572
8.33973		MS	3.4059	0.959805	c		FB	19.78	26.38	6.6	8.7	-2.1	4.28709
9.38268		YF	1.11378	0.121817	d		YL	21.7	27.34	5.64	8.7	-3.06	8.33973	7.76713	1.60477
5.57897		MF	0.104825	0.0658202	d		YL	20.28	25.75	5.47	8.7	-3.23	9.38268
2.25012		SD	3.06786	0.657414	c		YL	20.89	27.11	6.22	8.7	-2.48	5.57897
1.37554		BD	3.57994	0.836478	c		ML	20.29	27.82	7.53	8.7	-1.17	2.25012	1.85251	0.361427
1.93187							ML	20.48	28.72	8.24	8.7	-0.46	1.37554
2.80889							ML	21.25	29	7.75	8.7	-0.95	1.93187
4.72397							YS	19.48	26.69	7.21	8.7	-1.49	2.80889	3.65571	0.797355
3.43426							YS	19.75	26.21	6.46	8.7	-2.24	4.72397
3.605							YS	20.12	27.04	6.92	8.7	-1.78	3.43426
4.46915							MS	20.98	27.83	6.85	8.7	-1.85	3.605	3.4059	0.959805
2.14355							MS	18.98	25.52	6.54	8.7	-2.16	4.46915
1.25701							MS	20.08	27.68	7.6	8.7	-1.1	2.14355
0.959264							YF	19.36	27.73	8.37	8.7	-0.33	1.25701	1.11378	0.121817
1.12506							YF	18.91	27.67	8.76	8.7	0.06	0.959264
0.0289559							YF	20.45	28.98	8.53	8.7	-0.17	1.12506
0.0960547							ML	17.86	31.67	13.81	8.7	5.11	0.0289559	0.104825	0.0658202
0.189465							ML	18.02	30.1	12.08	8.7	3.38	0.0960547
3.03143							ML	18.76	29.86	11.1	8.7	2.4	0.189465
3.89062							SD	19.96	27.06	7.1	8.7	-1.6	3.03143	3.06786	0.657414
2.28153							SD	20.52	27.26	6.74	8.7	-1.96	3.89062
2.88786							SD	20.38	27.89	7.51	8.7	-1.19	2.28153
4.75683							BD	20.45	27.62	7.17	8.7	-1.53	2.88786	3.57994	0.836478
3.09513							BD	20.17	26.62	6.45	8.7	-2.25	4.75683
							BD	20.87	27.94	7.07	8.7	-1.63	3.09513
Pbrgene34018
1	0.539614						Sample Name	ACTIN	Cq	ΔCt		ΔΔCt	2（-ΔΔCt）	Mean value	Variance
2	1.85318		Tissue	Mean value	Variance	Significant difference	FR	18.82	24.38	5.56	4.67	0.89	0.539614	1.26251	0.54435
3	1.39474		FR	1.26251	0.54435		FR	19.88	23.66	3.78	4.67	-0.89	1.85318
4	0.444421		FB	0.629184	0.168883		FR	19.12	23.31	4.19	4.67	-0.48	1.39474
5	0.852635		YL	0.300361	0.0649892		FB	19.88	25.72	5.84	4.67	1.17	0.444421	0.629184	0.168883
6	0.590496		ML	0.0411325	0.0272432		FB	19.89	24.79	4.9	4.67	0.23	0.852635
7	0.210224		YS	0.0315105	0.00601361		FB	19.78	25.21	5.43	4.67	0.76	0.590496
8	0.329877		MS	0.28747	0.0618394		YL	19.7	26.62	6.92	4.67	2.25	0.210224	0.300361	0.0649892
9	0.360982		YF	0.348628	0.0331299		YL	20.28	26.55	6.27	4.67	1.6	0.329877
10	0.07966		MF	0.048839	0.00702668		YL	20.89	27.03	6.14	4.67	1.47	0.360982
11	0.0219445		SD	0.00605236	0.00155087		ML	20.29	28.61	8.32	4.67	3.65	0.07966	0.0411325	0.0272432
12	0.0217929		BD	0.418643	0.157887		ML	20.48	30.66	10.18	4.67	5.51	0.0219445
13	0.0376815						ML	20.75	30.94	10.19	4.67	5.52	0.0217929
14	0.0334929						YS	19.48	28.88	9.4	4.67	4.73	0.0376815	0.0315105	0.00601361
15	0.023357						YS	19.75	29.32	9.57	4.67	4.9	0.0334929
16	0.336808						YS	20.12	30.21	10.09	4.67	5.42	0.023357
17	0.200267						MS	19.98	26.22	6.24	4.67	1.57	0.336808	0.28747	0.0618394
18	0.325335						MS	18.98	25.97	6.99	4.67	2.32	0.200267
19	0.392292						MS	20.08	26.37	6.29	4.67	1.62	0.325335
20	0.312083						YF	19.36	25.38	6.02	4.67	1.35	0.392292	0.348628	0.0331299
21	0.34151						YF	18.91	25.26	6.35	4.67	1.68	0.312083
22	0.0587202						YF	20.45	26.67	6.22	4.67	1.55	0.34151
23	0.0448111						ML	17.86	26.62	8.76	4.67	4.09	0.0587202	0.048839	0.00702668
24	0.0429857						ML	18.02	27.17	9.15	4.67	4.48	0.0448111
25	0.00424506						ML	18.76	27.97	9.21	4.67	4.54	0.0429857
26	0.00587987						SD	19.36	31.91	12.55	4.67	7.88	0.00424506	0.00605236	0.00155087
27	0.00803214						SD	20.52	32.6	12.08	4.67	7.41	0.00587987
28	0.257028						SD	20.38	32.01	11.63	4.67	6.96	0.00803214
29	0.632878						BD	20.45	27.08	6.63	4.67	1.96	0.257028	0.418643	0.157887
30	0.366021						BD	20.17	25.5	5.33	4.67	0.66	0.632878
							BD	20.87	26.99	6.12	4.67	1.45	0.366021
Pbrgene43172
1	0.675955		Tissue	Mean value	Variance	Significant difference	Sample Name	ACTIN	Cq	ΔCt		ΔΔCt	2（-ΔΔCt）	Mean value	Variance
2	1.47939		FR	1.06957	0.3282	c	FR	18.82	30.32	11.5	10.935	0.565	0.675955	1.06957	0.3282
3	1.05336		FB	0.661764	0.0411543	c	FR	19.88	30.25	10.37	10.935	-0.565	1.47939
4	0.719467		YL	0.831189	0.0903612	c	FR	19.12	29.98	10.86	10.935	-0.075	1.05336
5	0.639493		ML	2.11149	0.407134	b	FB	19.88	31.29	11.41	10.935	0.475	0.719467	0.661764	0.0411543
6	0.626332		YS	0.572857	0.108753	c	FB	19.89	31.47	11.58	10.935	0.645	0.639493
7	0.744839		MS	3.94634	0.861017	a	FB	19.78	31.39	11.61	10.935	0.675	0.626332
8	0.792784		YF	1.36504	0.293389	bc	YL	19.7	31.06	11.36	10.935	0.425	0.744839	0.831189	0.0903612
9	0.955945		MF	1.18158	0.103134	c	YL	20.28	31.55	11.27	10.935	0.335	0.792784
10	2.47084		SD	0.727021	0.0951422	c	YL	20.89	31.89	11	10.935	0.065	0.955945
11	1.54221		BD	3.61529	0.64089	a	ML	20.29	29.92	9.63	10.935	-1.305	2.47084	2.11149	0.407134
12	2.32141						ML	20.48	30.79	10.31	10.935	-0.625	1.54221
13	0.724471		Flower				ML	20.75	30.47	9.72	10.935	-1.215	2.32141
14	0.474671		Flower Bud				YS	19.48	30.88	11.4	10.935	0.465	0.724471	0.572857	0.108753
15	0.51943		Young Leaf				YS	19.75	31.76	12.01	10.935	1.075	0.474671
16	5.15153		Mature Leaf				YS	20.12	32	11.88	10.935	0.945	0.51943
17	3.19319		Young Stem				MS	19.98	28.55	8.57	10.935	-2.365	5.15153	3.94634	0.861017
18	3.49429		Mature Stem				MS	18.98	28.24	9.26	10.935	-1.675	3.19319
19	1.73508		Young Fruit				MS	20.08	29.21	9.13	10.935	-1.805	3.49429
20	1.01748		Mature Fruit				YF	19.36	29.5	10.14	10.935	-0.795	1.73508	1.36504	0.293389
21	1.34257		Seed				YF	18.91	29.82	10.91	10.935	-0.025	1.01748
22	1.03886		Bud				YF	20.45	30.96	10.51	10.935	-0.425	1.34257
23	1.27899						ML	17.86	28.74	10.88	10.935	-0.055	1.03886	1.18158	0.103134
24	1.22688						ML	18.02	28.6	10.58	10.935	-0.355	1.27899
25	0.861546						ML	18.76	29.4	10.64	10.935	-0.295	1.22688
26	0.657471						SD	19.36	30.51	11.15	10.935	0.215	0.861546	0.727021	0.0951422
27	0.662044						SD	20.52	32.06	11.54	10.935	0.605	0.657471
28	4.45369						SD	20.38	31.91	11.53	10.935	0.595	0.662044
29	2.89788						BD	20.45	29.23	8.78	10.935	-2.155	4.45369	3.61529	0.64089
30	3.49429						BD	20.17	29.57	9.4	10.935	-1.535	2.89788
							BD	20.87	30	9.13	10.935	-1.805	3.49429

## Sheet: SA dealment
Expression patterns of PbrNPR1-like genes after SA treatment in Yali.
Pbrgene11264
Sample Name	Actin	Cq	ΔCt		ΔΔCt	2（-ΔΔCt）	Mean value	Variance		Time	Mean value	Variance	Significant difference
0	23.07	27.48	4.41	4.53333	-0.123333	1.08925	1.02355	0.21083		0h	1.02355	0.21083	cd		1	1.08925
0	22.82	27.79	4.97	4.53333	0.436667	0.73884				1h	1.67922	0.318873	c		2	0.73884
0	23.99	28.21	4.22	4.53333	-0.313333	1.24258				3h	3.16636	0.411289	b		3	1.24258
1	24.03	27.54	3.51	4.53333	-1.02333	2.03261	1.67922	0.318873		6h	2.88653	0.660158	b		4	2.03261
1	23.5	27.23	3.73	4.53333	-0.803333	1.74513				12h	6.8648	0.408529	a		5	1.74513
1	23.19	27.39	4.2	4.53333	-0.333333	1.25992				24h	2.73885	0.431667	b		6	1.25992
3	24.48	27.29	2.81	4.53333	-1.72333	3.30198	3.16636	0.411289		48h	0.814586	0.0968458	d		7	3.30198
3	24.75	27.44	2.69	4.53333	-1.84333	3.58838				72h	3.03313	0.30839	b		8	3.58838
3	24.72	27.87	3.15	4.53333	-1.38333	2.6087									9	2.6087
6	24.04	26.65	2.61	4.53333	-1.92333	3.79298	2.88653	0.660158							10	3.79298
6	24.32	27.46	3.14	4.53333	-1.39333	2.62685									11	2.62685
6	23.06	26.43	3.37	4.53333	-1.16333	2.23974									12	2.23974
12	25.31	27.07	1.76	4.53333	-2.77333	6.83686	6.8648	0.408529							13	6.83686
12	24.44	26.09	1.65	4.53333	-2.88333	7.37853									14	7.37853
12	24.32	26.18	1.86	4.53333	-2.67333	6.37901									15	6.37901
24	23.81	27.08	3.27	4.53333	-1.26333	2.4005	2.73885	0.431667							16	2.4005
24	24.5	27.29	2.79	4.53333	-1.74333	3.34808									17	3.34808
24	22.2	25.43	3.23	4.53333	-1.30333	2.46798									18	2.46798
48	22.89	27.98	5.09	4.53333	0.556667	0.679871	0.814586	0.0968458							19	0.679871
48	22.52	27.27	4.75	4.53333	0.216667	0.860551									20	0.860551
48	23.63	28.31	4.68	4.53333	0.146667	0.903335									21	0.903335
72	22.24	25.36	3.12	4.53333	-1.41333	2.66352	3.03313	0.30839							22	2.66352
72	24.5	27.44	2.94	4.53333	-1.59333	3.01746									23	3.01746
72	26.24	29	2.76	4.53333	-1.77333	3.41843									24	3.41843
Pbrgene6286
Sample Name	ACTIN	Cq	ΔCt		ΔΔCt	2（-ΔΔCt）	Mean value	Variance
0	23.07	24.2	1.13	0.926667	0.203333	0.868541	1.00489	0.0968452		Time	Mean value	Variance	Significant difference
0	22.82	23.63	0.81	0.926667	-0.116667	1.08423				0h	1.00489	0.0968452	cd	1	0.868541
0	23.99	24.83	0.84	0.926667	-0.0866667	1.06191				1h	1.87009	0.39743	bcd	2	1.08423
1	24.03	23.71	-0.32	0.926667	-1.24667	2.37293	1.87009	0.39743		3h	3.07187	0.721703	ab	3	1.06191
1	23.5	23.55	0.05	0.926667	-0.876667	1.83613				6h	4.44894	0.925752	a	4	2.37293
1	23.19	23.63	0.44	0.926667	-0.486667	1.4012				12h	4.21812	0.824765	a	5	1.83613
3	24.48	24.36	-0.12	0.926667	-1.04667	2.06575	3.07187	0.721703		24h	2.09058	0.661421	bc	6	1.4012
3	24.75	23.78	-0.97	0.926667	-1.89667	3.72352				48h	0.536774	0.0684786	d	7	2.06575
3	24.72	23.87	-0.85	0.926667	-1.77667	3.42634				72h	3.09228	0.988876	ab	8	3.72352
6	24.04	22.45	-1.59	0.926667	-2.51667	5.72258	4.44894	0.925752						9	3.42634
6	24.32	23.22	-1.1	0.926667	-2.02667	4.07462								10	5.72258
6	23.06	22.159	-0.901	0.926667	-1.82767	3.54963								11	4.07462
12	25.31	24.48	-0.83	0.926667	-1.75667	3.37916	4.21812	0.824765						12	3.54963
12	24.44	22.95	-1.49	0.926667	-2.41667	5.33936								13	3.37916
12	24.32	23.27	-1.05	0.926667	-1.97667	3.93583								14	5.33936
24	23.81	24.25	0.44	0.926667	-0.486667	1.4012	2.09058	0.661421						15	3.93583
24	24.5	23.85	-0.65	0.926667	-1.57667	2.9828								16	1.4012
24	22.2	22.21	0.01	0.926667	-0.916667	1.88775								17	2.9828
48	22.89	24.99	2.1	0.926667	1.17333	0.443396	0.536774	0.0684786						18	1.88775
48	22.52	24.17	1.65	0.926667	0.723333	0.605696								19	0.443396
48	23.63	25.39	1.76	0.926667	0.833333	0.561231								20	0.605696
72	22.24	22.12	-0.12	0.926667	-1.04667	2.06575	3.09228	0.988876						21	0.561231
72	24.5	23.28	-1.22	0.926667	-2.14667	4.42804								22	2.06575
72	26.24	25.69	-0.55	0.926667	-1.47667	2.78305								23	4.42804
														24	2.78305
Pbrgene8895
Sample Name	ACTIN	Cq	ΔCt		ΔΔCt	2（-ΔΔCt）	Mean value	Variance					Time	Mean value	Variance	Significant difference
0	23.07	25.76	2.69	2.88	-0.19	1.14076	1.02134	0.19802		1	1.14076		0h	1.02134	0.19802	bc
0	22.82	26.13	3.31	2.88	0.43	0.742262				2	0.742262		1h	1.67151	0.456374	b
0	23.99	26.63	2.64	2.88	-0.24	1.18099				3	1.18099		3h	1.80317	0.385335	ab
1	24.03	26.77	2.74	2.88	-0.14	1.10191	1.67151	0.456374		4	1.10191		6h	1.80083	0.287705	ab
1	23.5	25.23	1.73	2.88	-1.15	2.21914				5	2.21914		12h	2.72395	0.532062	a
1	23.19	25.31	2.12	2.88	-0.76	1.69349				6	1.69349		24h	1.95052	0.459795	ab
3	24.48	26.94	2.46	2.88	-0.42	1.33793	1.80317	0.385335		7	1.33793		48h	0.345283	0.0694896	c
3	24.75	26.44	1.69	2.88	-1.19	2.28153				8	2.28153		72h	1.86526	0.694674	ab
3	24.72	26.76	2.04	2.88	-0.84	1.79005				9	1.79005
6	24.04	26.38	2.34	2.88	-0.54	1.45397	1.80083	0.287705		10	1.45397
6	24.32	26.09	1.77	2.88	-1.11	2.15846				11	2.15846
6	23.06	25.1	2.04	2.88	-0.84	1.79005				12	1.79005
12	25.31	26.71	1.4	2.88	-1.48	2.78949	2.72395	0.532062		13	2.78949
12	24.44	25.58	1.14	2.88	-1.74	3.34035				14	3.34035
12	24.32	26.17	1.85	2.88	-1.03	2.04202				15	2.04202
24	23.81	25.39	1.58	2.88	-1.3	2.46229	1.95052	0.459795		16	2.46229
24	24.5	26.35	1.85	2.88	-1.03	2.04202				17	2.04202
24	22.2	24.65	2.45	2.88	-0.43	1.34723				18	1.34723
48	22.89	27.68	4.79	2.88	1.91	0.266093	0.345283	0.0694896		19	0.266093
48	22.52	26.6	4.08	2.88	1.2	0.435275				20	0.435275
48	23.63	28.09	4.46	2.88	1.58	0.334482				21	0.334482
72	22.24	25.17	2.93	2.88	0.05	0.965936	1.86526	0.694674		22	0.965936
72	24.5	26.4	1.9	2.88	-0.98	1.97247				23	1.97247
72	26.24	27.71	1.47	2.88	-1.41	2.65737				24	2.65737
Pbrgene2529
Sample Name	ACTIN	Cq	ΔCt		ΔΔCt	2（-ΔΔCt）	Mean value	Variance					Time	Mean value	Variance	Significant difference
0	23.07	25.81	2.74	2.12	0.62	0.650671	1.04354	0.278597		1	0.650671		0h	1.04354	0.278597	bc
0	22.82	24.66	1.84	2.12	-0.28	1.21419				2	1.21419		1h	0.936678	0.226607	bc
0	23.99	25.77	1.78	2.12	-0.34	1.26576				3	1.26576		3h	1.3866	0.386608	abc
1	24.03	25.82	1.79	2.12	-0.33	1.25701	0.936678	0.226607		4	1.25701		6h	1.66777	0.309015	ab
1	23.5	26	2.5	2.12	0.38	0.768438				5	0.768438		12h	2.28712	0.896901	a
1	23.19	25.66	2.47	2.12	0.35	0.784584				6	0.784584		24h	1.37083	0.210607	abc
3	24.48	26.49	2.01	2.12	-0.11	1.07923	1.3866	0.386608		7	1.07923		48h	0.504569	0.141246	c
3	24.75	26.67	1.92	2.12	-0.2	1.1487				8	1.1487		72h	1.4231	0.449011	abc
3	24.72	25.89	1.17	2.12	-0.95	1.93187				9	1.93187
6	24.04	25.11	1.07	2.12	-1.05	2.07053	1.66777	0.309015		10	2.07053
6	24.32	25.75	1.43	2.12	-0.69	1.61328				11	1.61328
6	23.06	24.78	1.72	2.12	-0.4	1.31951				12	1.31951
12	25.31	25.6	0.29	2.12	-1.83	3.55537	2.28712	0.896901		13	3.55537
12	24.44	25.85	1.41	2.12	-0.71	1.6358				14	1.6358
12	24.32	25.7	1.38	2.12	-0.74	1.67018				15	1.67018
24	23.81	25.38	1.57	2.12	-0.55	1.46409	1.37083	0.210607		16	1.46409
24	24.5	25.97	1.47	2.12	-0.65	1.56917				17	1.56917
24	22.2	24.21	2.01	2.12	-0.11	1.07923				18	1.07923
48	22.89	26.65	3.76	2.12	1.64	0.320856	0.504569	0.141246		19	0.320856
48	22.52	25.56	3.04	2.12	0.92	0.528509				20	0.528509
48	23.63	26.34	2.71	2.12	0.59	0.664343				21	0.664343
72	22.24	24.16	1.92	2.12	-0.2	1.1487	1.4231	0.449011		22	1.1487
72	24.5	26.53	2.03	2.12	-0.09	1.06437				23	1.06437
72	26.24	27.32	1.08	2.12	-1.04	2.05623				24	2.05623
Pbrgene8341
Sample Name	ACTIN	Cq	ΔCt		ΔΔCt	2（-ΔΔCt）	Mean value	Variance					Time	Mean value	Variance	Significant difference
0	23.07	24.44	1.37	1.04	0.33	0.795536	1.02624	0.239649		1	0.795536		0h	1.02624	0.239649	cd
0	22.82	23.42	0.6	1.04	-0.44	1.3566				2	1.3566		1h	1.10596	0.211305	cd
0	23.99	25.14	1.15	1.04	0.11	0.926588				3	0.926588		3h	1.77787	0.324559	bc
1	24.03	24.59	0.56	1.04	-0.48	1.39474	1.10596	0.211305		4	1.39474		6h	2.38918	0.497946	b
1	23.5	24.5	1	1.04	-0.04	1.02811				5	1.02811		12h	3.96492	0.468126	a
1	23.19	24.39	1.2	1.04	0.16	0.895025				6	0.895025		24h	0.318395	0.046204	c
3	24.48	25.12	0.64	1.04	-0.4	1.31951	1.77787	0.324559		7	1.31951		48h	0.291333	0.0622598	c
3	24.75	24.8	0.05	1.04	-0.99	1.98618				8	1.98618		72h	2.4853	0.692239	b
3	24.72	24.74	0.02	1.04	-1.02	2.02792				9	2.02792
6	24.04	23.51	-0.53	1.04	-1.57	2.96905	2.38918	0.497946		10	2.96905
6	24.32	24.07	-0.25	1.04	-1.29	2.44528				11	2.44528
6	23.06	23.29	0.23	1.04	-0.81	1.75321				12	1.75321
12	25.31	24.29	-1.02	1.04	-2.06	4.16986	3.96492	0.468126		13	4.16986
12	24.44	23.34	-1.1	1.04	-2.14	4.40762				14	4.40762
12	24.32	23.63	-0.69	1.04	-1.73	3.31728				15	3.31728
24	23.81	26.27	2.46	1.04	1.42	0.373712	0.318395	0.046204		16	0.373712
24	24.5	27.18	2.68	1.04	1.64	0.320856				17	0.320856
24	22.2	25.18	2.98	1.04	1.94	0.260616				18	0.260616
48	22.89	25.9	3.01	1.04	1.97	0.255253	0.291333	0.0622598		19	0.255253
48	22.52	24.96	2.44	1.04	1.4	0.378929				20	0.378929
48	23.63	26.73	3.1	1.04	2.06	0.239816				21	0.239816
72	22.24	22.13	-0.11	1.04	-1.15	2.21914	2.4853	0.692239		22	2.21914
72	24.5	24.69	0.19	1.04	-0.85	1.8025				23	1.8025
72	26.24	25.5	-0.74	1.04	-1.78	3.43426				24	3.43426
Pbrgene8896
Sample Name	ACTIN	Cq	ΔCt		ΔΔCt	2（-ΔΔCt）	Mean value	Variance					Time	Mean value	Variance	Significant difference
0	23.07	24.92	1.85	1.51333	0.336667	0.791869	1.02885	0.252533		1	0.791869		0h	1.02885	0.252533	bc
0	22.82	24.46	1.64	1.51333	0.126667	0.915945				2	0.915945		1h	0.550826	0.214519	cde
0	23.99	25.04	1.05	1.51333	-0.463333	1.37872				3	1.37872		3h	0.0835455	0.0144142	e
1	24.03	25.93	1.9	1.51333	0.386667	0.764895	0.550826	0.214519		4	0.764895		6h	0.395153	0.152384	de
1	23.5	25.68	2.18	1.51333	0.666667	0.629961				5	0.629961		12h	0.909949	0.183018	bcd
1	23.19	26.66	3.47	1.51333	1.95667	0.257623				6	0.257623		24h	1.86458	0.426564	a
3	24.48	29.92	5.44	1.51333	3.92667	0.0657591	0.0835455	0.0144142		7	0.0657591		48h	0.0170233	0.00239915	e
3	24.75	29.57	4.82	1.51333	3.30667	0.101063				8	0.101063		72h	1.52381	0.518513	ab
3	24.72	29.81	5.09	1.51333	3.57667	0.0838139				9	0.0838139
6	24.04	26.55	2.51	1.51333	0.996667	0.501157	0.395153	0.152384		10	0.501157
6	24.32	26.82	2.5	1.51333	0.986667	0.504642				11	0.504642
6	23.06	27.05	3.99	1.51333	2.47667	0.179659				12	0.179659
12	25.31	26.94	1.63	1.51333	0.116667	0.922316	0.909949	0.183018		13	0.922316
12	24.44	26.51	2.07	1.51333	0.556667	0.679871				14	0.679871
12	24.32	25.66	1.34	1.51333	-0.173333	1.12766				15	1.12766
24	23.81	24.96	1.15	1.51333	-0.363333	1.28639	1.86458	0.426564		16	1.28639
24	24.5	25.01	0.51	1.51333	-1.00333	2.00463				17	2.00463
24	22.2	22.51	0.31	1.51333	-1.20333	2.30271				18	2.30271
48	22.89	30.02	7.13	1.51333	5.61667	0.0203805	0.0170233	0.00239915		19	0.0203805
48	22.52	30.1	7.58	1.51333	6.06667	0.0149194				20	0.0149194
48	23.63	31.13	7.5	1.51333	5.98667	0.0157701				21	0.0157701
72	22.24	23.82	1.58	1.51333	0.0666667	0.954842	1.52381	0.518513		22	0.954842
72	24.5	25.52	1.02	1.51333	-0.493333	1.40769				23	1.40769
72	26.24	26.61	0.37	1.51333	-1.14333	2.20891				24	2.20891
Pbrgene34018
Sample Name	ACTIN	Cq	ΔCt		ΔΔCt	2（-ΔΔCt）	Mean value	Variance					Time	Mean value	Variance	Significant difference
0	23.07	31.2	8.13	8.41	-0.28	1.21419	1.01679	0.179864		1	1.21419		0h	1.01679	0.179864	bc
0	22.82	31.59	8.77	8.41	0.36	0.779165				2	0.779165		1h	1.56865	0.266365	b
0	23.99	32.32	8.33	8.41	-0.08	1.05702				3	1.05702		3h	2.56933	0.553953	a
1	24.03	31.98	7.95	8.41	-0.46	1.37554	1.56865	0.266365		4	1.37554		6h	1.2575	0.147377	b
1	23.5	31.44	7.94	8.41	-0.47	1.38511				5	1.38511		12h	1.68688	0.480862	b
1	23.19	30.64	7.45	8.41	-0.96	1.94531				6	1.94531		24h	0.339727	0.167524	d
3	24.48	31.19	6.71	8.41	-1.7	3.24901	2.56933	0.553953		7	3.24901		48h	1.39545	0.105539	b
3	24.75	31.8	7.05	8.41	-1.36	2.56685				8	2.56685		72h	0.437975	0.0782476	cd
3	24.72	32.21	7.49	8.41	-0.92	1.89212				9	1.89212
6	24.04	32.02	7.98	8.41	-0.43	1.34723	1.2575	0.147377		10	1.34723
6	24.32	32.27	7.95	8.41	-0.46	1.37554				11	1.37554
6	23.06	31.4	8.34	8.41	-0.07	1.04972				12	1.04972
12	25.31	33.49	8.18	8.41	-0.23	1.17283	1.68688	0.480862		13	1.17283
12	24.44	31.63	7.19	8.41	-1.22	2.32947				14	2.32947
12	24.32	32.09	7.77	8.41	-0.64	1.55833				15	1.55833
24	23.81	33.52	9.71	8.41	1.3	0.406126	0.339727	0.167524		16	0.406126
24	24.5	33.9	9.4	8.41	0.99	0.503478				17	0.503478
24	22.2	33.8	11.6	8.41	3.19	0.109576				18	0.109576
48	22.89	30.85	7.96	8.41	-0.45	1.36604	1.39545	0.105539		19	1.36604
48	22.52	30.31	7.79	8.41	-0.62	1.53688				20	1.53688
48	23.63	31.68	8.05	8.41	-0.36	1.28343				21	1.28343
72	22.24	31.69	9.45	8.41	1.04	0.486327	0.437975	0.0782476		22	0.486327
72	24.5	33.91	9.41	8.41	1	0.5				23	0.5
72	26.24	36.26	10.02	8.41	1.61	0.327598				24	0.327598
Pbrgene40077												Time	Mean value	Variance	Significant difference
Sample Name	ACTIN	Cq	ΔCt		ΔΔCt	2（-ΔΔCt）	Mean value	Variance		1	1.39474	0h	1.08587	0.384837	ab
0	23.07	29.94	6.87	7.35	-0.48	1.39474	1.08587	0.384837		2	0.543367	1h	1.58667	0.362876	a
0	22.82	31.05	8.23	7.35	0.88	0.543367				3	1.31951	3h	1.97215	0.583589	a
0	23.99	30.94	6.95	7.35	-0.4	1.31951				4	1.44393	6h	1.82769	0.444769	a
1	24.03	30.85	6.82	7.35	-0.53	1.44393	1.58667	0.362876		5	2.08493	12h	1.32689	0.0576627	ab
1	23.5	29.79	6.29	7.35	-1.06	2.08493				6	1.23114	24h	1.20328	0.444199	ab
1	23.19	30.24	7.05	7.35	-0.3	1.23114				7	1.23114	48h	0.571893	0.0577046	b
3	24.48	31.53	7.05	7.35	-0.3	1.23114	1.97215	0.583589		8	2.65737	72h	1.65291	0.557592	a
3	24.75	30.69	5.94	7.35	-1.41	2.65737				9	2.02792
3	24.72	31.05	6.33	7.35	-1.02	2.02792				10	1.24833
6	24.04	31.07	7.03	7.35	-0.32	1.24833	1.82769	0.444769		11	2.32947
6	24.32	30.45	6.13	7.35	-1.22	2.32947				12	1.90528
6	23.06	29.48	6.42	7.35	-0.93	1.90528				13	1.38511
12	25.31	32.19	6.88	7.35	-0.47	1.38511	1.32689	0.0576627		14	1.24833
12	24.44	31.47	7.03	7.35	-0.32	1.24833				15	1.34723
12	24.32	31.24	6.92	7.35	-0.43	1.34723				16	1.02101
24	23.81	31.13	7.32	7.35	-0.03	1.02101	1.20328	0.444199		17	1.81504
24	24.5	30.99	6.49	7.35	-0.86	1.81504				18	0.773782
24	22.2	29.92	7.72	7.35	0.37	0.773782				19	0.650671
48	22.89	30.86	7.97	7.35	0.62	0.650671	0.571893	0.0577046		20	0.550953
48	22.52	30.73	8.21	7.35	0.86	0.550953				21	0.514057
48	23.63	31.94	8.31	7.35	0.96	0.514057				22	0.888843
72	22.24	29.76	7.52	7.35	0.17	0.888843	1.65291	0.557592		23	1.86607
72	24.5	30.95	6.45	7.35	-0.9	1.86607				24	2.20381
72	26.24	32.45	6.21	7.35	-1.14	2.20381

## Sheet: fungal infection
Expression of PbrNPR1-like genes in Yali after inoculation with Alternaria alternata.
Pbrgene12425
Sample Name	Cq	ACTIN	ΔCt		ΔΔCt	2（-ΔΔCt）	Mean value	Variance
0h	26.4	25.38	1.02	1.01	0.01	0.993092	1.00178	0.0599996					Time	Mean value	Variance	Significant difference
0h	27.15	26.04	1.11	1.01	0.1	0.933033				1	0.993092		0h	1.00178	0.0599996	e
0h	24	23.1	0.9	1.01	-0.11	1.07923				2	0.933033		6h	6.25049	0.471095	b
6h	24.34	26.12	-1.78	1.01	-2.79	6.9163	6.25049	0.471095		3	1.07923		12h	2.83677	0.641184	cde
6h	23.3	24.86	-1.56	1.01	-2.57	5.93809				4	6.9163		24h	0.681753	0.182277	e
6h	25.25	26.8	-1.55	1.01	-2.56	5.89708				5	5.93809		48h	1.80036	0.468519	de
12h	28.5	28.47	0.03	1.01	-0.98	1.97247	2.83677	0.641184		6	5.89708		72h	4.12671	1.07328	bc
12h	27.95	28.75	-0.8	1.01	-1.81	3.50642				7	1.97247		96h	12.2742	2.21189	a
12h	27.78	28.37	-0.59	1.01	-1.6	3.03143				8	3.50642		120h	3.49053	1.1019	cd
24h	27.79	25.92	1.87	1.01	0.86	0.550953	0.681753	0.182277		9	3.03143
24h	28.8	27.7	1.1	1.01	0.09	0.939523				10	0.550953
24h	26.67	24.81	1.86	1.01	0.85	0.554785				11	0.939523
48h	24.2	23.72	0.48	1.01	-0.53	1.44393	1.80036	0.468519		12	0.554785
48h	22.46	22.75	-0.29	1.01	-1.3	2.46229				13	1.44393
48h	25.08	24.65	0.43	1.01	-0.58	1.49485				14	2.46229
72h	24.24	25.63	-1.39	1.01	-2.4	5.27803	4.12671	1.07328		15	1.49485
72h	24.43	25.56	-1.13	1.01	-2.14	4.40762				16	5.27803
72h	25.73	26.15	-0.42	1.01	-1.43	2.69447				17	4.40762
96h	26.51	28.75	-2.24	1.01	-3.25	9.51366	12.2742	2.21189		18	2.69447
96h	26.49	29.11	-2.62	1.01	-3.63	12.3805				19	9.51366
96h	25.92	28.81	-2.89	1.01	-3.9	14.9285				20	12.3805
120h	27.32	27.3	0.02	1.01	-0.99	1.98618	3.49053	1.1019		21	14.9285
120h	27.64	28.59	-0.95	1.01	-1.96	3.89062				22	1.98618
120h	28.19	29.38	-1.19	1.01	-2.2	4.59479				23	3.89062
										24	4.59479
Pbrgene6286
Sample Name	Cq	ACTIN	ΔCt		ΔΔCt	2（-ΔΔCt）	Mean value	Variance			2（-ΔΔCt）
0h	25.15	25.38	-0.23	-0.426667	0.196667	0.872564	1.03011	0.261007		1	0.872564		Time	Mean value	Variance	Significant difference
0h	25.9	26.04	-0.14	-0.426667	0.286667	0.819794				2	0.819794		0h	1.03011	0.261007	b
0h	22.19	23.1	-0.91	-0.426667	-0.483333	1.39797				3	1.39797		6h	0.681253	0.100497	b
6h	26.22	26.12	0.1	-0.426667	0.526667	0.694157	0.681253	0.100497		4	0.694157		12h	0.945975	0.108878	b
6h	24.76	24.86	-0.1	-0.426667	0.326667	0.797377				5	0.797377		24h	0.5043	0.145702	b
6h	27.23	26.8	0.43	-0.426667	0.856667	0.552227				6	0.552227		48h	0.906142	0.113978	b
12h	28.36	28.47	-0.11	-0.426667	0.316667	0.802923	0.945975	0.108878		7	0.802923		72h	1.21774	0.0927984	b
12h	28.23	28.75	-0.52	-0.426667	-0.0933333	1.06683				8	1.06683		96h	3.46011	0.776335	a
12h	27.99	28.37	-0.38	-0.426667	0.0466667	0.968171				9	0.968171		120h	3.21139	0.994827	a
24h	26.73	25.92	0.81	-0.426667	1.23667	0.424352	0.5043	0.145702		10	0.424352
24h	27.77	27.7	0.07	-0.426667	0.496667	0.708742				11	0.708742
24h	25.78	24.81	0.97	-0.426667	1.39667	0.379806				12	0.379806
48h	23.64	23.72	-0.08	-0.426667	0.346667	0.786399	0.906142	0.113978		13	0.786399
48h	22.52	22.75	-0.23	-0.426667	0.196667	0.872564				14	0.872564
48h	24.14	24.65	-0.51	-0.426667	-0.0833333	1.05946				15	1.05946
72h	24.79	25.63	-0.84	-0.426667	-0.413333	1.33176	1.21774	0.0927984		16	1.33176
72h	24.85	25.56	-0.71	-0.426667	-0.283333	1.217				17	1.217
72h	25.58	26.15	-0.57	-0.426667	-0.143333	1.10445				18	1.10445
96h	26.14	28.75	-2.61	-0.426667	-2.18333	4.54202	3.46011	0.776335		19	4.54202
96h	27.22	29.11	-1.89	-0.426667	-1.46333	2.75745				20	2.75745
96h	26.76	28.81	-2.05	-0.426667	-1.62333	3.08086				21	3.08086
120h	26.02	27.3	-1.28	-0.426667	-0.853333	1.80667	3.21139	0.994827		22	1.80667
120h	26.22	28.59	-2.37	-0.426667	-1.94333	3.84593				23	3.84593
120h	26.96	29.38	-2.42	-0.426667	-1.99333	3.98156				24	3.98156
Pbrgene8895
Sample Name	Cq	ACTIN	ΔCt		ΔΔCt	2（-ΔΔCt）	Mean value	Variance
0h	29.84	25.38	4.46	4.15667	0.303333	0.810378	1.01123	0.146176		1	0.810378				Time	Mean value	Variance	Significant difference
0h	30.1	26.04	4.06	4.15667	-0.0966667	1.0693				2	1.0693				0h	1.01123	0.146176	c
0h	27.05	23.1	3.95	4.15667	-0.206667	1.15402				3	1.15402				6h	0.338152	0.0967292	c
6h	31.93	26.12	5.81	4.15667	1.65333	0.317905	0.338152	0.0967292		4	0.317905				12h	2.23382	0.139255	b
6h	30.12	24.86	5.26	4.15667	1.10333	0.46544				5	0.46544				24h	0.842984	0.33797	c
6h	33.07	26.8	6.27	4.15667	2.11333	0.231112				6	0.231112				48h	1.78716	0.539956	b
12h	31.45	28.47	2.98	4.15667	-1.17667	2.26054	2.23382	0.139255		7	2.26054				72h	2.1627	0.393514	b
12h	31.87	28.75	3.12	4.15667	-1.03667	2.05148				8	2.05148				96h	3.031	0.419477	a
12h	31.27	28.37	2.9	4.15667	-1.25667	2.38943				9	2.38943				120h	0.839736	0.333524	c
24h	30.94	25.92	5.02	4.15667	0.863333	0.549681	0.842984	0.33797		10	0.549681
24h	31.46	27.7	3.76	4.15667	-0.396667	1.31646				11	1.31646
24h	29.56	24.81	4.75	4.15667	0.593333	0.66281				12	0.66281
48h	27.48	23.72	3.76	4.15667	-0.396667	1.31646	1.78716	0.539956		13	1.31646
48h	26.32	22.75	3.57	4.15667	-0.586667	1.50177				14	1.50177
48h	27.46	24.65	2.81	4.15667	-1.34667	2.54324				15	2.54324
72h	29.09	25.63	3.46	4.15667	-0.696667	1.62076	2.1627	0.393514		16	1.62076
72h	28.37	25.56	2.81	4.15667	-1.34667	2.54324				17	2.54324
72h	29.09	26.15	2.94	4.15667	-1.21667	2.32409				18	2.32409
96h	31.05	28.75	2.3	4.15667	-1.85667	3.6217	3.031	0.419477		19	3.6217
96h	31.84	29.11	2.73	4.15667	-1.42667	2.68825				20	2.68825
96h	31.49	28.81	2.68	4.15667	-1.47667	2.78305				21	2.78305
120h	32.77	27.3	5.47	4.15667	1.31333	0.40239	0.839736	0.333524		22	0.40239
120h	32.89	28.59	4.3	4.15667	0.143333	0.905425				23	0.905425
120h	33.26	29.38	3.88	4.15667	-0.276667	1.21139				24	1.21139
Pbrgene2529
Sample Name	Cq	ACTIN	ΔCt		ΔΔCt	2（-ΔΔCt）	Mean value	Variance					Time	Mean value	Variance	Significant difference
0h	23.44	25.38	-1.94	-1.53667	-0.403333	1.32256	1.0319	0.24934		1	1.32256		0h	1.0319	0.24934	c
0h	24.99	26.04	-1.05	-1.53667	0.486667	0.713672				2	0.713672		6h	1.2678	0.399912	c
0h	21.48	23.1	-1.62	-1.53667	-0.0833333	1.05946				3	1.05946		12h	7.76128	0.711962	a
6h	24.86	26.12	-1.26	-1.53667	0.276667	0.825496	1.2678	0.399912		4	0.825496		24h	2.81667	0.742997	b
6h	23.08	24.86	-1.78	-1.53667	-0.243333	1.18372				5	1.18372		48h	1.04687	0.264273	c
6h	24.42	26.8	-2.38	-1.53667	-0.843333	1.79419				6	1.79419		72h	1.32322	0.269809	c
12h	24.17	28.47	-4.3	-1.53667	-2.76333	6.78963	7.76128	0.711962		7	6.78963		96h	0.882858	0.225264	c
12h	24.21	28.75	-4.54	-1.53667	-3.00333	8.01851				8	8.01851		120h	1.56093	0.38676	c
12h	23.75	28.37	-4.62	-1.53667	-3.08333	8.4757				9	8.4757
24h	22.44	25.92	-3.48	-1.53667	-1.94333	3.84593	2.81667	0.742997		10	3.84593
24h	24.85	27.7	-2.85	-1.53667	-1.31333	2.48515				11	2.48515
24h	22.19	24.81	-2.62	-1.53667	-1.08333	2.11893				12	2.11893
48h	22.47	23.72	-1.25	-1.53667	0.286667	0.819794	1.04687	0.264273		13	0.819794
48h	21.36	22.75	-1.39	-1.53667	0.146667	0.903335				14	0.903335
48h	22.61	24.65	-2.04	-1.53667	-0.503333	1.41748				15	1.41748
72h	23.5	25.63	-2.13	-1.53667	-0.593333	1.50873	1.32322	0.269809		16	1.50873
72h	24.11	25.56	-1.45	-1.53667	0.0866667	0.941696				17	0.941696
72h	24.01	26.15	-2.14	-1.53667	-0.603333	1.51922				18	1.51922
96h	27.37	28.75	-1.38	-1.53667	0.156667	0.897095	0.882858	0.225264		19	0.897095
96h	28.31	29.11	-0.8	-1.53667	0.736667	0.600124				20	0.600124
96h	27.07	28.81	-1.74	-1.53667	-0.203333	1.15136				21	1.15136
120h	25.53	27.3	-1.77	-1.53667	-0.233333	1.17555	1.56093	0.38676		22	1.17555
120h	26.55	28.59	-2.04	-1.53667	-0.503333	1.41748				23	1.41748
120h	26.78	29.38	-2.6	-1.53667	-1.06333	2.08975				24	2.08975
Pbrgene8341
Sample Name	Cq	ACTIN	ΔCt		ΔΔCt	2（-ΔΔCt）	Mean value	Variance
0h	24.96	25.38	-0.42	-0.106667	-0.313333	1.24258	1.03657	0.256379	1	1.24258		Time	Mean value	Variance	Significant difference
0h	25.68	26.04	-0.36	-0.106667	-0.253333	1.19196			2	1.19196		0h	1.03657	0.256379	b
0h	23.56	23.1	0.46	-0.106667	0.566667	0.675175			3	0.675175		6h	0.519335	0.144698	c
6h	26.48	26.12	0.36	-0.106667	0.466667	0.723635	0.519335	0.144698	4	0.723635		12h	5.35658	0.226242	a
6h	25.98	24.86	1.12	-0.106667	1.22667	0.427304			5	0.427304		24h	0.510113	0.182459	c
6h	27.99	26.8	1.19	-0.106667	1.29667	0.407066			6	0.407066		48h	0.525209	0.12537	c
12h	26.03	28.47	-2.44	-0.106667	-2.33333	5.03968	5.35658	0.226242	7	5.03968		72h	0.587628	0.164666	c
12h	26.19	28.75	-2.56	-0.106667	-2.45333	5.4768			8	5.4768		96h	0.227013	0.117512	c
12h	25.79	28.37	-2.58	-0.106667	-2.47333	5.55325			9	5.55325		120h	1.34069	0.225871	b
24h	26.21	25.92	0.29	-0.106667	0.396667	0.759611	0.510113	0.182459	10	0.759611
24h	28.77	27.7	1.07	-0.106667	1.17667	0.442372			11	0.442372
24h	26.31	24.81	1.5	-0.106667	1.60667	0.328356			12	0.328356
48h	24.15	23.72	0.43	-0.106667	0.536667	0.689362	0.525209	0.12537	13	0.689362
48h	24.02	22.75	1.27	-0.106667	1.37667	0.385108			14	0.385108
48h	25.54	24.65	0.89	-0.106667	0.996667	0.501157			15	0.501157
72h	26.94	25.63	1.31	-0.106667	1.41667	0.374577	0.587628	0.164666	16	0.374577
72h	25.82	25.56	0.26	-0.106667	0.366667	0.775572			17	0.775572
72h	26.75	26.15	0.6	-0.106667	0.706667	0.612734			18	0.612734
96h	29.99	28.75	1.24	-0.106667	1.34667	0.393199	0.227013	0.117512	19	0.393199
96h	31.8	29.11	2.69	-0.106667	2.79667	0.143919			20	0.143919
96h	31.5	28.81	2.69	-0.106667	2.79667	0.143919			21	0.143919
120h	27.03	27.3	-0.27	-0.106667	-0.163333	1.11987	1.34069	0.225871	22	1.11987
120h	27.76	28.59	-0.83	-0.106667	-0.723333	1.65099			23	1.65099
120h	28.95	29.38	-0.43	-0.106667	-0.323333	1.25122			24	1.25122
Pbrgene8896
Sample Name	Cq	ACTIN	ΔCt		ΔΔCt	2（-ΔΔCt）	Mean value	Variance					Time	Mean value	Variance	Significant difference
0h	29.93	25.38	4.55	5.04667	-0.496667	1.41095	1.0677	0.348884		1	1.41095		0h	1.0677	0.348884	cd
0h	30.82	26.04	4.78	5.04667	-0.266667	1.20303				2	1.20303		6h	1.44746	0.498107	cd
0h	28.91	23.1	5.81	5.04667	0.763333	0.589134				3	0.589134		12h	4.60373	0.964583	a
6h	31.19	26.12	5.07	5.04667	0.0233333	0.983957	1.44746	0.498107		4	0.983957		24h	1.03236	0.277623	cd
6h	29.62	24.86	4.76	5.04667	-0.286667	1.21982				5	1.21982		48h	0.211055	0.0820671	d
6h	30.75	26.8	3.95	5.04667	-1.09667	2.1386				6	2.1386		72h	3.50029	0.601976	ab
12h	30.94	28.47	2.47	5.04667	-2.57667	5.9656	4.60373	0.964583		7	5.9656		96h	0.497654	0.183236	d
12h	31.8	28.75	3.05	5.04667	-1.99667	3.99077				8	3.99077		120h	2.1114	1.36757	bc
12h	31.47	28.37	3.1	5.04667	-1.94667	3.85483				9	3.85483
24h	30.69	25.92	4.77	5.04667	-0.276667	1.21139	1.03236	0.277623		10	1.21139
24h	32.43	27.7	4.73	5.04667	-0.316667	1.24545				11	1.24545
24h	30.5	24.81	5.69	5.04667	0.643333	0.640232				12	0.640232
48h	31.54	23.72	7.82	5.04667	2.77333	0.146266	0.211055	0.0820671		13	0.146266
48h	30.44	22.75	7.69	5.04667	2.64333	0.160058				14	0.160058
48h	31.31	24.65	6.66	5.04667	1.61333	0.326842				15	0.326842
72h	29.16	25.63	3.53	5.04667	-1.51667	2.86129	3.50029	0.601976		16	2.86129
72h	28.87	25.56	3.31	5.04667	-1.73667	3.33264				17	3.33264
72h	29.09	26.15	2.94	5.04667	-2.10667	4.30695				18	4.30695
96h	34.34	28.75	5.59	5.04667	0.543333	0.686184	0.497654	0.183236		19	0.686184
96h	35	29.11	5.89	5.04667	0.843333	0.557354				20	0.557354
96h	35.86	28.81	7.05	5.04667	2.00333	0.249423				21	0.249423
120h	33.82	27.3	6.52	5.04667	1.47333	0.360149	2.1114	1.36757		22	0.360149
120h	32.45	28.59	3.86	5.04667	-1.18667	2.27626				23	2.27626
120h	32.54	29.38	3.16	5.04667	-1.88667	3.6978				24	3.6978
Pbrgene34018
Sample Name	Cq	ACTIN	ΔCt		ΔΔCt	2（-ΔΔCt）	Mean value	Variance
0h	34	25.38	8.62	8.7	-0.08	1.05702	1.22596	0.726897		1	1.05702		Time	Mean value	Variance	Significant difference
0h	35.95	26.04	9.91	8.7	1.21	0.432269				2	0.432269		0h	1.22596	0.726897	b
0h	30.67	23.1	7.57	8.7	-1.13	2.18859				3	2.18859		6h	0.565304	0.252867	bc
6h	35.81	26.12	9.69	8.7	0.99	0.503478	0.565304	0.252867		4	0.503478		12h	3.17218	0.452689	a
6h	35.34	24.86	10.48	8.7	1.78	0.291183				5	0.291183		24h	0.597342	0.175193	bc
6h	35.65	26.8	8.85	8.7	0.15	0.90125				6	0.90125		48h	0.153924	0.027237	c
12h	35.3	28.47	6.83	8.7	-1.87	3.65533	3.17218	0.452689		7	3.65533		72h	0.564111	0.111057	bc
12h	35.73	28.75	6.98	8.7	-1.72	3.29436				8	3.29436		96h	0.346037	0.0193993	c
12h	35.71	28.37	7.34	8.7	-1.36	2.56685				9	2.56685		120h	3.33593	0.49041	a
24h	35.22	25.92	9.3	8.7	0.6	0.659754	0.597342	0.175193		10	0.659754
24h	36.77	27.7	9.07	8.7	0.37	0.773782				11	0.773782
24h	34.99	24.81	10.18	8.7	1.48	0.358489				12	0.358489
48h	35.49	23.72	11.77	8.7	3.07	0.11908	0.153924	0.027237		13	0.11908
48h	33.88	22.75	11.13	8.7	2.43	0.185565				14	0.185565
48h	36.02	24.65	11.37	8.7	2.67	0.157127				15	0.157127
72h	35.5	25.63	9.87	8.7	1.17	0.444421	0.564111	0.111057		16	0.444421
72h	35.16	25.56	9.6	8.7	0.9	0.535887				17	0.535887
72h	35.34	26.15	9.19	8.7	0.49	0.712025				18	0.712025
96h	38.92	28.75	10.17	8.7	1.47	0.360982	0.346037	0.0193993		19	0.360982
96h	39.29	29.11	10.18	8.7	1.48	0.358489				20	0.358489
96h	39.16	28.81	10.35	8.7	1.65	0.31864				21	0.31864
120h	34.44	27.3	7.14	8.7	-1.56	2.94854	3.33593	0.49041		22	2.94854
120h	35.28	28.59	6.69	8.7	-2.01	4.02782				23	4.02782
120h	36.48	29.38	7.1	8.7	-1.6	3.03143				24	3.03143
Pbrgene40077
Sample Name	Cq	ACTIN	ΔCt		ΔΔCt	2（-ΔΔCt）	Mean value	Variance
0h	30.96	25.38	5.58	5.98	-0.4	1.31951	1.02579	0.230016		1	1.31951		Time	Mean value	Variance	Significant difference
0h	32.42	26.04	6.38	5.98	0.4	0.757858				2	0.757858		0h	1.02579	0.230016	c
0h	29.08	23.1	5.98	5.98	0	1				3	1		6h	1.72086	0.238159	c
6h	31.44	26.12	5.32	5.98	-0.66	1.58008	1.72086	0.238159		4	1.58008		12h	2.86186	0.0567791	b
6h	30.23	24.86	5.37	5.98	-0.61	1.52626				5	1.52626		24h	0.998746	0.148744	c
6h	31.74	26.8	4.94	5.98	-1.04	2.05623				6	2.05623		48h	0.177504	0.0615709	d
12h	32.9	28.47	4.43	5.98	-1.55	2.92817	2.86186	0.0567791		7	2.92817		72h	1.17518	0.370137	c
12h	33.25	28.75	4.5	5.98	-1.48	2.78949				8	2.78949		96h	2.94439	0.124813	b
12h	32.83	28.37	4.46	5.98	-1.52	2.86791				9	2.86791		120h	4.35975	0.761435	a
24h	31.67	25.92	5.75	5.98	-0.23	1.17283	0.998746	0.148744		10	1.17283
24h	33.66	27.7	5.96	5.98	-0.02	1.01396				11	1.01396
24h	31.095	24.81	6.285	5.98	0.305	0.809442				12	0.809442
48h	32.53	23.72	8.81	5.98	2.83	0.140632	0.177504	0.0615709		13	0.140632
48h	31.7	22.75	8.95	5.98	2.97	0.127627				14	0.127627
48h	32.55	24.65	7.9	5.98	1.92	0.264255				15	0.264255
72h	30.85	25.63	5.22	5.98	-0.76	1.69349	1.17518	0.370137		16	1.69349
72h	31.77	25.56	6.21	5.98	0.23	0.852635				17	0.852635
72h	32.16	26.15	6.01	5.98	0.03	0.97942				18	0.97942
96h	33.1	28.75	4.35	5.98	-1.63	3.09513	2.94439	0.124813		19	3.09513
96h	33.53	29.11	4.42	5.98	-1.56	2.94854				20	2.94854
96h	33.31	28.81	4.5	5.98	-1.48	2.78949				21	2.78949
120h	30.95	27.3	3.65	5.98	-2.33	5.02805	4.35975	0.761435		22	5.02805
120h	32.85	28.59	4.26	5.98	-1.72	3.29436				23	3.29436
120h	33.11	29.38	3.73	5.98	-2.25	4.75683				24	4.75683

## Sheet: circadian rhythm
Expression profile of PbrNPR1-like genes in Yali during a day.
Pbrgene12425												Time	Mean value	Variance	Significant difference
ACTIN	Cq	ΔCt		ΔΔCt	2（-ΔΔCt）	Mean value	Variance					06:00:00	0.713956	0.262856	c
24.95	28.13	3.18	3.33333	-0.153333	1.11214	1.17437	0.609331		1	1.11214		09:00:00	1.17437	0.609331	c
25.34	29.79	4.45	3.33333	1.11667	0.461158				2	0.461158		12:00:00	5.66858	0.776139	b
24.69	27.06	2.37	3.33333	-0.963333	1.94981				3	1.94981		15:00:00	11.4328	2.28191	a
23.1	23.68	0.58	3.33333	-2.75333	6.74273	5.66858	0.776139		4	6.74273		18:00:00	1.36255	0.383813	c
24.8	25.72	0.92	3.33333	-2.41333	5.32704				5	5.32704		21:00:00	4.15227	0.734175	b
24.21	25.24	1.03	3.33333	-2.30333	4.93597				6	4.93597		0:00	0.656089	0.399706	c
25.82	25.38	-0.44	3.33333	-3.77333	13.6737	11.4328	2.28191		7	13.6737		03:00:00	0.472589	0.0502946	c
25.05	25.33	0.28	3.33333	-3.05333	8.30128				8	8.30128
24.01	23.72	-0.29	3.33333	-3.62333	12.3234				9	12.3234
23.83	26.45	2.62	3.33333	-0.713333	1.63959	1.36255	0.383813		10	1.63959
23.57	26.2	2.63	3.33333	-0.703333	1.62826				11	1.62826
22.74	26.36	3.62	3.33333	0.286667	0.819794				12	0.819794
23.83	25.49	1.66	3.33333	-1.67333	3.18951	4.15227	0.734175		13	3.18951
28.8	29.82	1.02	3.33333	-2.31333	4.9703				14	4.9703
28.28	29.51	1.23	3.33333	-2.10333	4.29701				15	4.29701
23.07	28.07	5	3.33333	1.66667	0.31498	0.656089	0.399706		16	0.31498
23.16	27.69	4.53	3.33333	1.19667	0.436282				17	0.436282
25.5	28.55	3.05	3.33333	-0.283333	1.217				18	1.217
23.57	27.88	4.31	3.33333	0.976667	0.508152	0.472589	0.0502946		19	0.508152
23.23	27.88	4.65	3.33333	1.31667	0.401461				20	0.401461
23.13	27.44	4.31	3.33333	0.976667	0.508152				21	0.508152
24.54	27.78	3.24	3.33333	-0.0933333	1.06683	0.713956	0.262856		22	1.06683
23.45	27.98	4.53	3.33333	1.19667	0.436282				23	0.436282
24.81	28.79	3.98	3.33333	0.646667	0.638754				24	0.638754
Pbrgene6286												Time	Mean value	Variance	Significant difference
Sample Name	ACTIN	Cq	ΔCt		ΔΔCt	2（-ΔΔCt）	Mean value	Variance				06:00:00	0.46069	0.0389024	d
9	24.95	26.04	1.09	1.17	-0.08	1.05702	1.00084	0.0412226		1	1.05702	09:00:00	1.00084	0.0412226	a
9	25.34	26.57	1.23	1.17	0.06	0.959264				2	0.959264	12:00:00	0.635161	0.0819165	cd
9	24.69	25.88	1.19	1.17	0.02	0.986233				3	0.986233	15:00:00	0.824618	0.0868726	b
12	23.1	25.15	2.05	1.17	0.88	0.543367	0.635161	0.0819165		4	0.543367	18:00:00	0.693454	0.0972737	bc
12	24.8	26.66	1.86	1.17	0.69	0.619854				5	0.619854	21:00:00	0.55819	0.0303134	cd
12	24.21	25.81	1.6	1.17	0.43	0.742262				6	0.742262	0:00	0.485552	0.130338	d
15	25.82	27.15	1.33	1.17	0.16	0.895025	0.824618	0.0868726		7	0.895025	03:00:00	0.477056	0.0754866	d
15	25.05	26.41	1.36	1.17	0.19	0.876606				8	0.876606
15	24.01	25.69	1.68	1.17	0.51	0.702222				9	0.702222
18	23.83	25.84	2.01	1.17	0.84	0.558644	0.693454	0.0972737		10	0.558644
18	23.57	25.18	1.61	1.17	0.44	0.737135				11	0.737135
18	22.74	24.26	1.52	1.17	0.35	0.784584				12	0.784584
21	23.83	25.82	1.99	1.17	0.82	0.566442	0.55819	0.0303134		13	0.566442
21	28.8	30.92	2.12	1.17	0.95	0.517632				14	0.517632
21	28.28	30.21	1.93	1.17	0.76	0.590496				15	0.590496
24	23.07	25.77	2.7	1.17	1.53	0.346277	0.485552	0.130338		16	0.346277
24	23.16	25.48	2.32	1.17	1.15	0.450625				17	0.450625
24	25.5	27.27	1.77	1.17	0.6	0.659754				18	0.659754
3	23.57	26.14	2.57	1.17	1.4	0.378929	0.477056	0.0754866		19	0.378929
3	23.23	25.43	2.2	1.17	1.03	0.48971				20	0.48971
3	23.13	25.13	2	1.17	0.83	0.562529				21	0.562529
6	24.54	26.99	2.45	1.17	1.28	0.411796	0.46069	0.0389024		22	0.411796
6	23.45	25.73	2.28	1.17	1.11	0.463294				23	0.463294
6	24.81	26.96	2.15	1.17	0.98	0.50698				24	0.50698
Pbrgene8895										Time	Mean value	Variance	Significant difference
Sample Name	ACTIN	Cq	ΔCt		ΔΔCt	2（-ΔΔCt）	Mean value	Variance		06:00:00	1.01899	0.120422	b
9	24.95	29.15	4.2	4.3	-0.1	1.07177	1.00344	0.0815343		09:00:00	1.00344	0.0815343	b	1	1.07177
9	25.34	29.81	4.47	4.3	0.17	0.888843				12:00:00	2.02627	0.488065	a	2	0.888843
9	24.69	28.92	4.23	4.3	-0.07	1.04972				15:00:00	1.00833	0.181697	b	3	1.04972
12	23.1	26.6	3.5	4.3	-0.8	1.7411	2.02627	0.488065		18:00:00	0.547883	0.186589	bcd	4	1.7411
12	24.8	27.66	2.86	4.3	-1.44	2.71321				21:00:00	0.162958	0.0980759	d	5	2.71321
12	24.21	27.81	3.6	4.3	-0.7	1.6245				0:00	0.477821	0.111852	cd	6	1.6245
15	25.82	29.86	4.04	4.3	-0.26	1.19748	1.00833	0.181697		03:00:00	0.813527	0.0459552	bc	7	1.19748
15	25.05	29.26	4.21	4.3	-0.09	1.06437								8	1.06437
15	24.01	28.7	4.69	4.3	0.39	0.76313								9	0.76313
18	23.83	29.24	5.41	4.3	1.11	0.463294	0.547883	0.186589						10	0.463294
18	23.57	28.18	4.61	4.3	0.31	0.806642								11	0.806642
18	22.74	28.46	5.72	4.3	1.42	0.373712								12	0.373712
21	23.83	32.67	8.84	4.3	4.54	0.0429857	0.162958	0.0980759						13	0.0429857
21	28.8	34.92	6.12	4.3	1.82	0.283221								14	0.283221
21	28.28	35.2	6.92	4.3	2.62	0.162668								15	0.162668
24	23.07	28.32	5.25	4.3	0.95	0.517632	0.477821	0.111852						16	0.517632
24	23.16	28.22	5.06	4.3	0.76	0.590496								17	0.590496
24	25.5	31.42	5.92	4.3	1.62	0.325335								18	0.325335
3	23.57	28.25	4.68	4.3	0.38	0.768438	0.813527	0.0459552						19	0.768438
3	23.23	27.86	4.63	4.3	0.33	0.795536								20	0.795536
3	23.13	27.62	4.49	4.3	0.19	0.876606								21	0.876606
6	24.54	28.77	4.23	4.3	-0.07	1.04972	1.01899	0.120422						22	1.04972
6	23.45	27.55	4.1	4.3	-0.2	1.1487								23	1.1487
6	24.81	29.33	4.52	4.3	0.22	0.858565								24	0.858565
Pbrgene2529
Sample Name	ACTIN	Cq	ΔCt		ΔΔCt	2（-ΔΔCt）	Mean value	Variance
9	24.95	26.26	1.31	1.61333	-0.303333	1.23399	1.02322	0.208738		1	1.23399	Time	Mean value	Variance	Significant difference
9	25.34	27.39	2.05	1.61333	0.436667	0.73884				2	0.73884	06:00:00	1.2172	0.23711	a
9	24.69	26.17	1.48	1.61333	-0.133333	1.09682				3	1.09682	09:00:00	1.02322	0.208738	ab
12	23.1	25.15	2.05	1.61333	0.436667	0.73884	0.852515	0.0997452		4	0.73884	12:00:00	0.852515	0.0997452	abc
12	24.8	26.44	1.64	1.61333	0.0266667	0.981686				5	0.981686	15:00:00	0.446831	0.188447	d
12	24.21	26.08	1.87	1.61333	0.256667	0.83702				6	0.83702	18:00:00	0.26087	0.15049	d
15	25.82	28	2.18	1.61333	0.566667	0.675175	0.446831	0.188447		7	0.675175	21:00:00	0.614468	0.129612	cd
15	25.05	27.81	2.76	1.61333	1.14667	0.451668				8	0.451668	0:00	0.656935	0.198267	bcd
15	24.01	27.85	3.84	1.61333	2.22667	0.213652				9	0.213652	03:00:00	0.638601	0.0754111	bcd
18	23.83	27.46	3.63	1.61333	2.01667	0.247129	0.26087	0.15049		10	0.247129
18	23.57	26.33	2.76	1.61333	1.14667	0.451668				11	0.451668
18	22.74	27.93	5.19	1.61333	3.57667	0.0838139				12	0.0838139
21	23.83	25.83	2	1.61333	0.386667	0.764895	0.614468	0.129612		13	0.764895
21	28.8	31.08	2.28	1.61333	0.666667	0.629961				14	0.629961
21	28.28	31.05	2.77	1.61333	1.15667	0.448548				15	0.448548
24	23.07	26	2.93	1.61333	1.31667	0.401461	0.656935	0.198267		16	0.401461
24	23.16	24.95	1.79	1.61333	0.176667	0.884745				17	0.884745
24	25.5	27.66	2.16	1.61333	0.546667	0.6846				18	0.6846
3	23.57	25.99	2.42	1.61333	0.806667	0.571701	0.638601	0.0754111		19	0.571701
3	23.23	25.58	2.35	1.61333	0.736667	0.600124				20	0.600124
3	23.13	25.17	2.04	1.61333	0.426667	0.743979				21	0.743979
6	24.54	25.76	1.22	1.61333	-0.393333	1.31342	1.2172	0.23711		22	1.31342
6	23.45	25.23	1.78	1.61333	0.166667	0.890899				23	0.890899
6	24.81	25.89	1.08	1.61333	-0.533333	1.44727				24	1.44727
Pbrgene8341												Time	Mean value	Variance	Significant difference
Sample Name	ACTIN	Cq	ΔCt		ΔΔCt	2（-ΔΔCt）	Mean value	Variance				06:00:00	1.64408	0.120663	ab
9	24.95	25.97	1.02	0.453333	0.566667	0.675175	1.03688	0.258074		1	0.675175	09:00:00	1.03688	0.258074	cd
9	25.34	25.56	0.22	0.453333	-0.233333	1.17555				2	1.17555	12:00:00	1.89934	0.546461	a
9	24.69	24.81	0.12	0.453333	-0.333333	1.25992				3	1.25992	15:00:00	0.995824	0.138993	cd
12	23.1	23.05	-0.05	0.453333	-0.503333	1.41748	1.89934	0.546461		4	1.41748	18:00:00	0.759992	0.141842	c
12	24.8	23.84	-0.96	0.453333	-1.41333	2.66352				5	2.66352	21:00:00	0.0377892	0.0235653	e
12	24.21	23.97	-0.24	0.453333	-0.693333	1.61702				6	1.61702	0:00	1.17928	0.168322	bcd
15	25.82	26.31	0.49	0.453333	0.0366667	0.974905	0.995824	0.138993		7	0.974905	03:00:00	1.45656	0.331083	abc
15	25.05	25.27	0.22	0.453333	-0.233333	1.17555				8	1.17555
15	24.01	24.72	0.71	0.453333	0.256667	0.83702				9	0.83702
18	23.83	24.79	0.96	0.453333	0.506667	0.703847	0.759992	0.141842		10	0.703847
18	23.57	24.09	0.52	0.453333	0.0666667	0.954842				11	0.954842
18	22.74	23.88	1.14	0.453333	0.686667	0.621288				12	0.621288
21	23.83	28.1	4.27	0.453333	3.81667	0.070969	0.0377892	0.0235653		13	0.070969
21	28.8	35.01	6.21	0.453333	5.75667	0.0184957				14	0.0184957
21	28.28	34.12	5.84	0.453333	5.38667	0.023903				15	0.023903
24	23.07	23.32	0.25	0.453333	-0.203333	1.15136	1.17928	0.168322		16	1.15136
24	23.16	23.63	0.47	0.453333	0.0166667	0.988514				17	0.988514
24	25.5	25.47	-0.03	0.453333	-0.483333	1.39797				18	1.39797
3	23.57	24.03	0.46	0.453333	0.00666667	0.99539	1.45656	0.331083		19	0.99539
3	23.23	22.99	-0.24	0.453333	-0.693333	1.61702				20	1.61702
3	23.13	22.77	-0.36	0.453333	-0.813333	1.75727				21	1.75727
6	24.54	24.16	-0.38	0.453333	-0.833333	1.7818	1.64408	0.120663		22	1.7818
6	23.45	23.17	-0.28	0.453333	-0.733333	1.66248				23	1.66248
6	24.81	24.69	-0.12	0.453333	-0.573333	1.48796				24	1.48796
Pbrgene8896												Time	Mean value	Variance	Significant difference
Sample Name	ACTIN	Cq	ΔCt		ΔΔCt	2（-ΔΔCt）	Mean value	Variance				06:00:00	1.2172	0.23711	a
9	24.95	26.26	1.31	1.61333	-0.303333	1.23399	1.02322	0.208738	1	1.23399		09:00:00	1.02322	0.208738	ab
9	25.34	27.39	2.05	1.61333	0.436667	0.73884			2	0.73884		12:00:00	0.852515	0.0997452	bc
9	24.69	26.17	1.48	1.61333	-0.133333	1.09682			3	1.09682		15:00:00	0.491307	0.136846	e
12	23.1	25.15	2.05	1.61333	0.436667	0.73884	0.852515	0.0997452	4	0.73884		18:00:00	0.26087	0.15049	d
12	24.8	26.44	1.64	1.61333	0.0266667	0.981686			5	0.981686		21:00:00	0.614468	0.129612	cd
12	24.21	26.08	1.87	1.61333	0.256667	0.83702			6	0.83702		0:00	0.790756	0.0821604	bcd
15	25.82	28	2.18	1.61333	0.566667	0.675175	0.491307	0.136846	7	0.675175		03:00:00	0.638601	0.0754111	cd
15	25.05	27.81	2.76	1.61333	1.14667	0.451668			8	0.451668
15	24.01	27.15	3.14	1.61333	1.52667	0.347078			9	0.347078
18	23.83	27.46	3.63	1.61333	2.01667	0.247129	0.26087	0.15049	10	0.247129
18	23.57	26.33	2.76	1.61333	1.14667	0.451668			11	0.451668
18	22.74	27.93	5.19	1.61333	3.57667	0.0838139			12	0.0838139
21	23.83	25.83	2	1.61333	0.386667	0.764895	0.614468	0.129612	13	0.764895
21	28.8	31.08	2.28	1.61333	0.666667	0.629961			14	0.629961
21	28.28	31.05	2.77	1.61333	1.15667	0.448548			15	0.448548
24	23.07	25	1.93	1.61333	0.316667	0.802923	0.790756	0.0821604	16	0.802923
24	23.16	24.95	1.79	1.61333	0.176667	0.884745			17	0.884745
24	25.5	27.66	2.16	1.61333	0.546667	0.6846			18	0.6846
3	23.57	25.99	2.42	1.61333	0.806667	0.571701	0.638601	0.0754111	19	0.571701
3	23.23	25.58	2.35	1.61333	0.736667	0.600124			20	0.600124
3	23.13	25.17	2.04	1.61333	0.426667	0.743979			21	0.743979
6	24.54	25.76	1.22	1.61333	-0.393333	1.31342	1.2172	0.23711	22	1.31342
6	23.45	25.23	1.78	1.61333	0.166667	0.890899			23	0.890899
6	24.81	25.89	1.08	1.61333	-0.533333	1.44727			24	1.44727
Pbrgene34018
Sample Name	ACTIN	Cq	ΔCt		ΔΔCt	2（-ΔΔCt）	Mean value	Variance				Time	Mean value	Variance	Significant difference
9	24.95	33.6	8.65	8.33667	0.313333	0.80478	1.01397	0.166207		1	0.80478	06:00:00	0.936716	0.083717
9	25.34	33.4	8.06	8.33667	-0.276667	1.21139				2	1.21139	09:00:00	1.01397	0.166207
9	24.69	32.99	8.3	8.33667	-0.0366667	1.02574				3	1.02574	12:00:00	4.62613	0.872113
12	23.1	29.61	6.51	8.33667	-1.82667	3.54717	4.62613	0.872113		4	3.54717	15:00:00	1.95642	0.580237
12	24.8	30.92	6.12	8.33667	-2.21667	4.64818				5	4.64818	18:00:00	1.83921	0.340842
12	24.21	30.04	5.83	8.33667	-2.50667	5.68305				6	5.68305	21:00:00	3.00561	0.228831
15	25.82	33.89	8.07	8.33667	-0.266667	1.20303	1.95642	0.580237		7	1.20303	0:00	0.434686	0.0357413
15	25.05	32	6.95	8.33667	-1.38667	2.61474				8	2.61474	03:00:00	0.920982	0.17426
15	24.01	31.31	7.3	8.33667	-1.03667	2.05148				9	2.05148
18	23.83	31.67	7.84	8.33667	-0.496667	1.41095	1.83921	0.340842		10	1.41095
18	23.57	31.01	7.44	8.33667	-0.896667	1.86176				11	1.86176
18	22.74	29.91	7.17	8.33667	-1.16667	2.24492				12	2.24492
21	23.83	30.74	6.91	8.33667	-1.42667	2.68825	3.00561	0.228831		13	2.68825
21	28.8	35.45	6.65	8.33667	-1.68667	3.21912				14	3.21912
21	28.28	34.98	6.7	8.33667	-1.63667	3.10947				15	3.10947
24	23.07	32.69	9.62	8.33667	1.28333	0.410845	0.434686	0.0357413		16	0.410845
24	23.16	32.54	9.38	8.33667	1.04333	0.485205				17	0.485205
24	25.5	35.13	9.63	8.33667	1.29333	0.408007				18	0.408007
3	23.57	31.69	8.12	8.33667	-0.216667	1.16205	0.920982	0.17426		19	1.16205
3	23.23	31.97	8.74	8.33667	0.403333	0.756109				20	0.756109
3	23.13	31.71	8.58	8.33667	0.243333	0.844791				21	0.844791
6	24.54	32.81	8.27	8.33667	-0.0666667	1.04729	0.936716	0.083717		22	1.04729
6	23.45	32.03	8.58	8.33667	0.243333	0.844791				23	0.844791
6	24.81	33.27	8.46	8.33667	0.123333	0.918064				24	0.918064
Pbrgene40077
Sample Name	ACTIN	Cq	ΔCt		ΔΔCt	2（-ΔΔCt）	Mean value	Variance
9	24.95	32.33	7.38	7.55333	-0.173333	1.12766	1.02018	0.193006		1	1.12766	Time	Mean value	Variance	Significant difference
9	25.34	32.65	7.31	7.55333	-0.243333	1.18372				2	1.18372	06:00:00	0.566884	0.0688146	bc
9	24.69	32.66	7.97	7.55333	0.416667	0.749154				3	0.749154	09:00:00	1.02018	0.193006	bc
12	23.1	31.7	8.6	7.55333	1.04667	0.484085	0.692791	0.156395		4	0.484085	12:00:00	0.692791	0.156395	bc
12	24.8	32.57	7.77	7.55333	0.216667	0.860551				5	0.860551	15:00:00	1.5558	0.304229	b
12	24.21	32.21	8	7.55333	0.446667	0.733736				6	0.733736	18:00:00	0.775789	0.178059	bc
15	25.82	33.2	7.38	7.55333	-0.173333	1.12766	1.5558	0.304229		7	1.12766	21:00:00	11.6088	1.17134	a
15	25.05	31.75	6.7	7.55333	-0.853333	1.80667				8	1.80667	0:00	0.377776	0.0423125	c
15	24.01	30.77	6.76	7.55333	-0.793333	1.73307				9	1.73307	03:00:00	0.269987	0.0981786	c
18	23.83	31.49	7.66	7.55333	0.106667	0.928731	0.775789	0.178059		10	0.928731
18	23.57	31.32	7.75	7.55333	0.196667	0.872564				11	0.872564
18	22.74	31.22	8.48	7.55333	0.926667	0.526072				12	0.526072
21	23.83	27.9	4.07	7.55333	-3.48333	11.1838	11.6088	1.17134		13	11.1838
21	28.8	32.97	4.17	7.55333	-3.38333	10.4348				14	10.4348
21	28.28	32.11	3.83	7.55333	-3.72333	13.2079				15	13.2079
24	23.07	31.83	8.76	7.55333	1.20667	0.433269	0.377776	0.0423125		16	0.433269
24	23.16	32.15	8.99	7.55333	1.43667	0.36942				17	0.36942
24	25.5	34.65	9.15	7.55333	1.59667	0.33064				18	0.33064
3	23.57	32.46	8.89	7.55333	1.33667	0.395934	0.269987	0.0981786		19	0.395934
3	23.23	33.46	10.23	7.55333	2.67667	0.156402				20	0.156402
3	23.13	32.64	9.51	7.55333	1.95667	0.257623				21	0.257623
6	24.54	33.17	8.63	7.55333	1.07667	0.474123	0.566884	0.0688146		22	0.474123
6	23.45	31.77	8.32	7.55333	0.766667	0.587774				23	0.587774
6	24.81	33.01	8.2	7.55333	0.646667	0.638754				24	0.638754
